# Supplementary material
Source: MDPI journal article supplement (https://www.mdpi.com/2227-9717/9/9/1590)
Supplement: s1 [file s1]

## **Supporting Information**

### **Synthesis of palladium and copper nanoparticles supported on TiO<sub>2</sub> for oxidation solvent-free aerobic oxidation of benzyl alcohol**

Hamed M. Alshammari\*

Chemistry Department, Faculty of Science, Ha'il University, P. O. Box 2440, Ha'il, Saudi Arabia.

\* Correspondence: author: e-mail: [h.alshammari@uoh.edu.sa](mailto:h.alshammari@uoh.edu.sa)

## Section S1. GC data

### <Sample Information>

Sample Name : Pd-Cu/TiO2  
Sample ID : Pd-Cu  
Data Filename : Pd-Cu\_TiO2.gcd  
Method Filename : Benzyl alcohol 2020.gcm  
Batch Filename : Pd-Cu-TiO2.gcb  
Vial # : 7  
Injection Volume : 1 uL  
Date Acquired : 2/17/2021 12:12:33 PM  
Date Processed : 2/17/2021 12:26:36 PM

Sample Type : Unknown  
Acquired by : System Administrator  
Processed by : System Administrator

### <Chromatogram>

uV

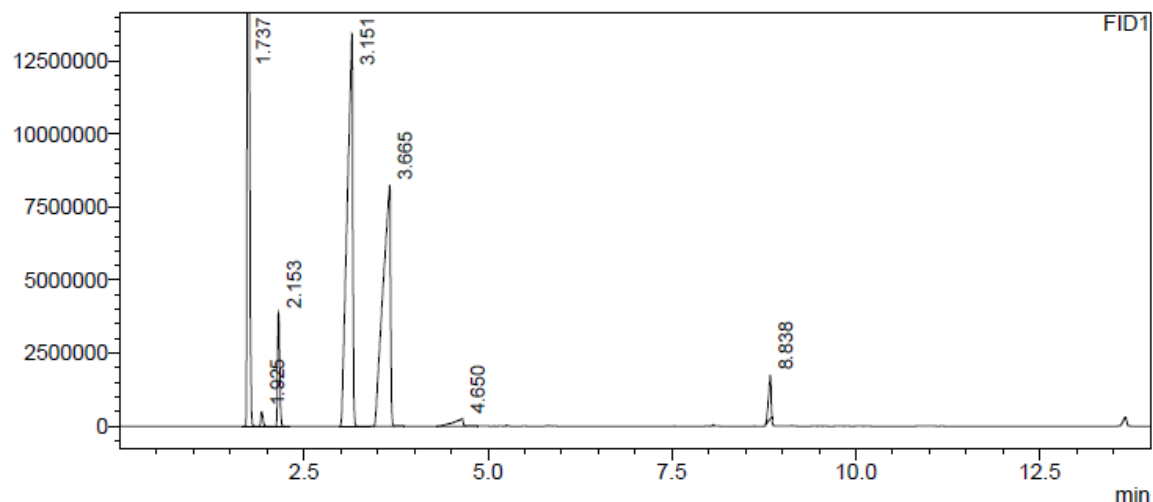

### <Peak Table>

FID1

| Peak# | Ret. Time | Name           | Area      | Height   | Conc. | Unit |
|-------|-----------|----------------|-----------|----------|-------|------|
| 1     | 1.737     |                | 58695690  | 27545786 | 0.000 |      |
| 2     | 1.925     | Benzene        | 982462    | 494681   | 0.000 | ppm  |
| 3     | 2.153     | Toluene        | 7950687   | 3820946  | 0.000 | ppm  |
| 4     | 3.151     | Benzaldehyde   | 69672717  | 13223258 | 0.000 | ppm  |
| 5     | 3.665     | Benzyl alcohol | 58634784  | 8168983  | 0.000 | ppm  |
| 6     | 4.650     | Benzoic acid   | 2318545   | 246000   | 0.000 | ppm  |
| 7     | 8.838     |                | 3542533   | 1477536  | 0.000 |      |
| Total |           |                | 201797418 | 54977191 |       |      |

# UOH-

## <Sample Information>

Sample Name : Pd0.25-Cu0.75/TiO2  
 Sample ID : cat 4  
 Data Filename : cat 4.gcd  
 Method Filename : Benzyl alcohol 2020.gcm  
 Batch Filename : Pd-Cu-TiO2 different ratios.gcb  
 Vial # : 9  
 Injection Volume : 1 uL  
 Date Acquired : 2/24/2021 1:55:01 PM  
 Date Processed : 2/24/2021 3:56:51 PM

Sample Type : Unknown

Acquired by : System Administrator  
 Processed by : System Administrator

## <Chromatogram>

uV

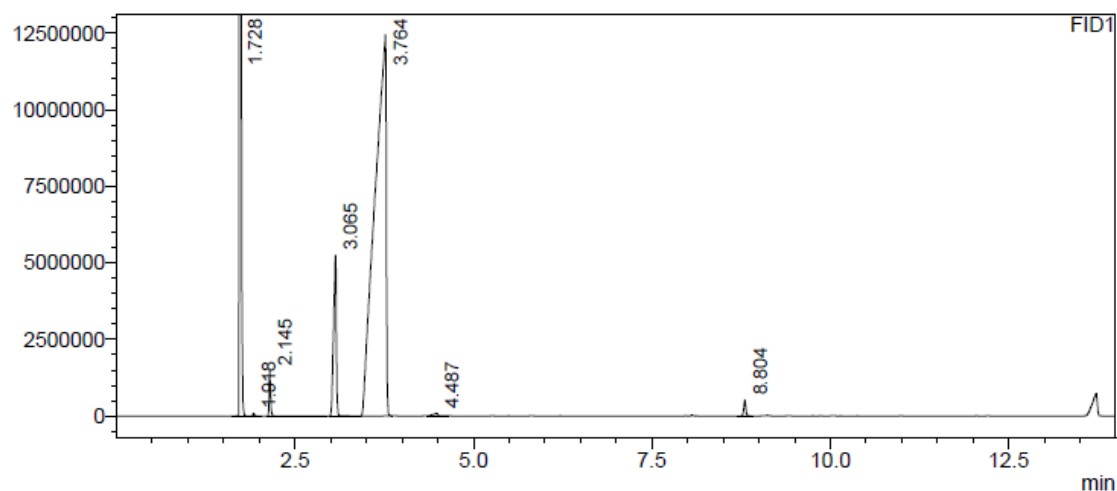

## <Peak Table>

FID1

| Peak# | Ret. Time | Name           | Area      | Height   | Conc. | Unit |
|-------|-----------|----------------|-----------|----------|-------|------|
| 1     | 1.728     |                | 49510552  | 29996035 | 0.000 |      |
| 2     | 1.918     | Benzene        | 112460    | 77655    | 0.000 | ppm  |
| 3     | 2.145     | Toluene        | 2142985   | 1451414  | 0.000 | ppm  |
| 4     | 3.065     | Benzaldehyde   | 13923541  | 5181541  | 0.000 | ppm  |
| 5     | 3.764     | Benzyl alcohol | 136112142 | 12407153 | 0.000 | ppm  |
| 6     | 4.487     | Benzoic acid   | 394630    | 80155    | 0.000 | ppm  |
| 7     | 8.804     | Benzylbenzoate | 976551    | 508605   | 0.000 | ppm  |
| Total |           |                | 203172861 | 49702558 |       |      |

# UOH-

## <Sample Information>

|                  |                                   |              |                        |
|------------------|-----------------------------------|--------------|------------------------|
| Sample Name      | : Pd/TiO2                         | Sample Type  | : Unknown              |
| Sample ID        | : cat 1                           |              |                        |
| Data Filename    | : cat1.gcd                        |              |                        |
| Method Filename  | : Benzyl alcohol 2020.gcm         |              |                        |
| Batch Filename   | : Pd-Cu-TiO2 different ratios.gcb |              |                        |
| Vial #           | : 6                               |              |                        |
| Injection Volume | : 1 uL                            |              |                        |
| Date Acquired    | : 2/24/2021 12:57:00 PM           | Acquired by  | : System Administrator |
| Date Processed   | : 2/24/2021 1:11:02 PM            | Processed by | : System Administrator |

## <Chromatogram>

uV

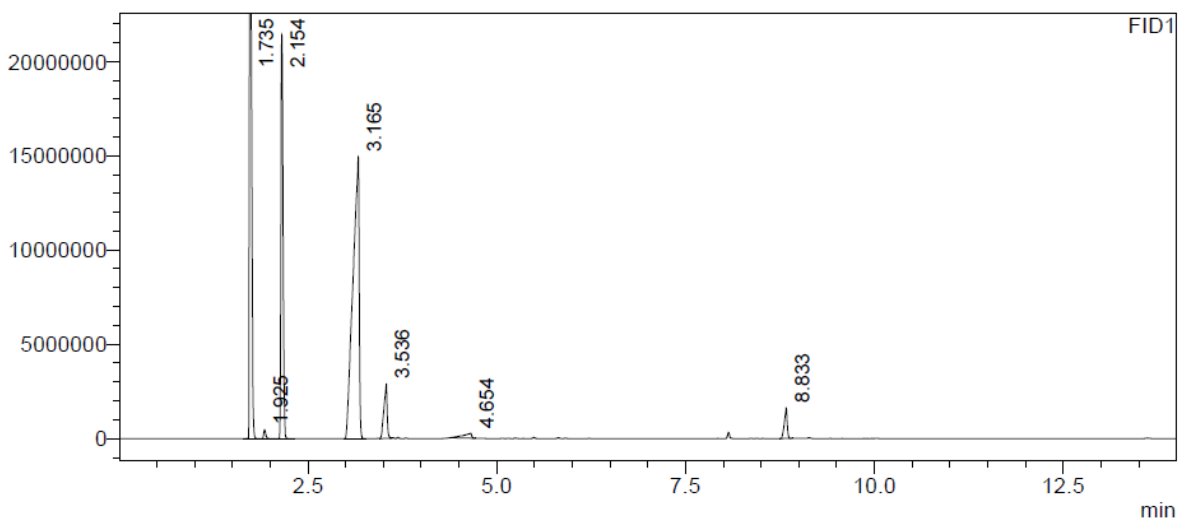

## <Peak Table>

FID1

| Peak# | Ret. Time | Name           | Area      | Height   | Conc. | Unit |
|-------|-----------|----------------|-----------|----------|-------|------|
| 1     | 1.735     |                | 59351630  | 29451339 | 0.000 |      |
| 2     | 1.925     | Benzene        | 885897    | 459621   | 0.000 | ppm  |
| 3     | 2.154     | Toluene        | 42539368  | 21293887 | 0.000 | ppm  |
| 4     | 3.165     | Benzaldehyde   | 85437981  | 14872129 | 0.000 | ppm  |
| 5     | 3.536     | Benzyl alcohol | 8593556   | 2876054  | 0.000 | ppm  |
| 6     | 4.654     | Benzoic acid   | 2138796   | 258271   | 0.000 | ppm  |
| 7     | 8.833     | Benzylbenzoate | 4185764   | 1589481  | 0.000 | ppm  |
| Total |           |                | 203132993 | 70800782 |       |      |

### <Sample Information>

Sample Name : Pd0.75-Cu0.25/TiO2  
Sample ID : cat 3  
Data Filename : cat 3.gcd  
Method Filename : Benzyl alcohol 2020.gcm  
Batch Filename : Pd-Cu-TiO2 different ratios.gcb  
Vial # : 8  
Injection Volume : 1 uL  
Date Acquired : 2/24/2021 1:35:41 PM  
Date Processed : 2/24/2021 3:54:30 PM

Sample Type : Unknown  
Acquired by : System Administrator  
Processed by : System Administrator

### <Chromatogram>

uV

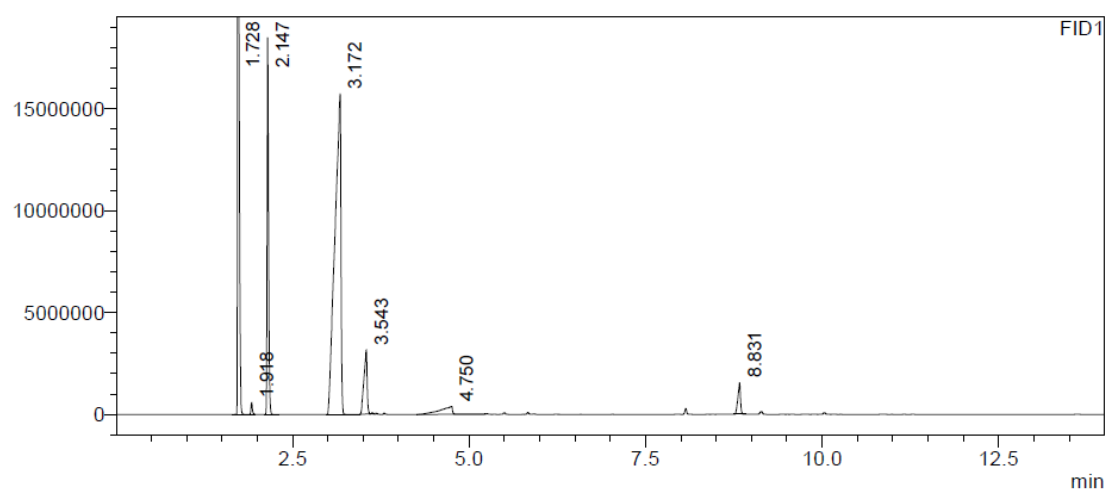

### <Peak Table>

FID1

| Peak# | Ret. Time | Name           | Area      | Height   | Conc. | Unit |
|-------|-----------|----------------|-----------|----------|-------|------|
| 1     | 1.728     |                | 50156280  | 30057821 | 0.000 |      |
| 2     | 1.918     | Benzene        | 810745    | 547665   | 0.000 | ppm  |
| 3     | 2.147     | Toluene        | 27829932  | 18049766 | 0.000 | ppm  |
| 4     | 3.172     | Benzaldehyde   | 92980037  | 15657086 | 0.000 | ppm  |
| 5     | 3.543     | Benzyl alcohol | 9823296   | 3107453  | 0.000 | ppm  |
| 6     | 4.750     | Benzoic acid   | 4719239   | 383685   | 0.000 | ppm  |
| 7     | 8.831     | Benzylbenzoate | 3989474   | 1550526  | 0.000 | ppm  |
| Total |           |                | 190309004 | 69354003 |       |      |

### <Sample Information>

Sample Name : Cu/TiO2  
Sample ID : cat 2  
Data Filename : cat 2.gcd  
Method Filename : Benzyl alcohol 2020.gcm  
Batch Filename : Pd-Cu-TiO2 different ratios.gcb  
Vial # : 7  
Injection Volume : 1 uL  
Date Acquired : 2/24/2021 1:16:19 PM  
Date Processed : 2/24/2021 1:30:23 PM

Sample Type : Unknown  
Acquired by : System Administrator  
Processed by : System Administrator

### <Chromatogram>

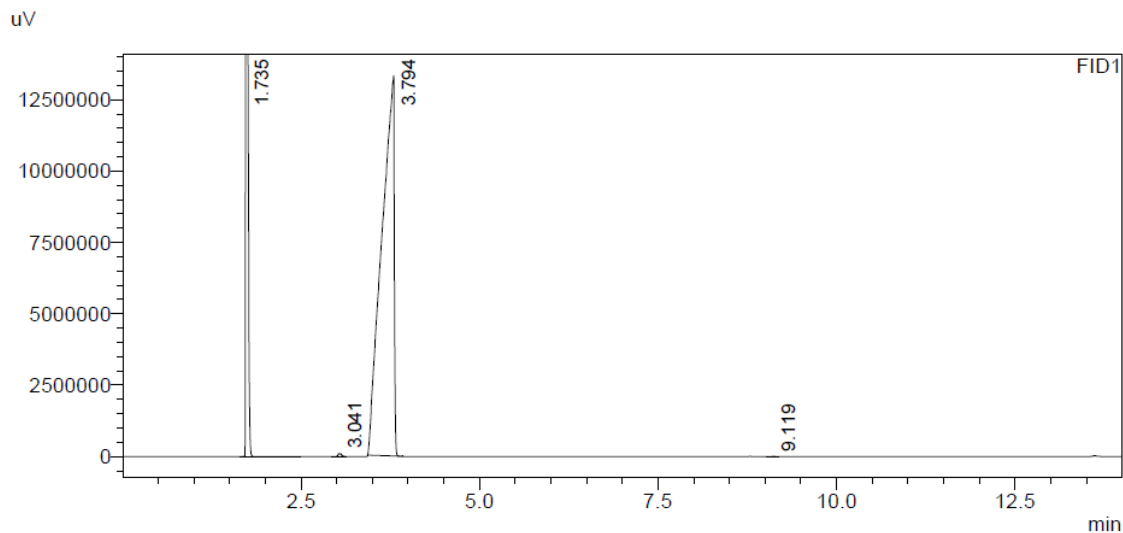

### <Peak Table>

| FID1  |           |                |           |          |       |      |
|-------|-----------|----------------|-----------|----------|-------|------|
| Peak# | Ret. Time | Name           | Area      | Height   | Conc. | Unit |
| 1     | 1.735     |                | 59240788  | 28604318 | 0.000 |      |
| 2     | 3.041     | Benzaldehyde   | 322844    | 106274   | 0.000 | ppm  |
| 3     | 3.794     | Benzyl alcohol | 160953621 | 13266701 | 0.000 | ppm  |
| 4     | 9.119     | Benzylbenzoate | 4521      | 1852     | 0.000 | ppm  |
| Total |           |                | 220521773 | 41979143 |       |      |
